# Supplementary material for: Identification of Halophilic Microbes in Lung Fibrotic Tissue by Oligotyping
Source: Front Microbiol. 2018 Aug 30;9:1892. doi: 10.3389/fmicb.2018.01892 (PMC6127444; doi:10.3389/fmicb.2018.01892)
Supplement: Supplementary file 8 [file Table_4.DOC]

**Healthy subjects**

**(n=3)**

**Genera**

**IPF patients (n=3)**

**Supplementary Table 4. Genus frequency in BALF (%)**

**ance in BALF**

**Other**

**(n=2)**

*g__Actinobacillus*

*g__Actinomyces*

*g__Actinomycetaceae*

*g__Aerococcaceae*

*g__Aggregatibacter*

*g__Bacteroidales*

*g__Campylobacter*

*g__Capnocytophaga*

*g__Christensenellaceae*

*g__Clostridiaceae-1*

*g__Clostridiaceae-2*

*g__Clostridiales-1*

*g__Clostridium*

*g__Coprococcus*

*g__Fusobacterium*

*g__Gemellaceae*

*g__Granulicatella*

*g__Haemophilus*

*g__Halomonadaceae*

*g__Halomonas*

*g__Leptotrichia*

*g__Megasphaera*

*g__Neisseria*

*g__Neisseriaceae*

*g__Oribacterium*

*g__Pasteurellaceae*

*g__Pirellulaceae*

*g__Porphyromonas*

*g__Prevotella*

*g__Pseudomonas*

*g__Ruminococcaceae*

*g__Sediminibacterium*

*g__Selenomonas*

*g__Shewanella*

*g__SR1*

*g__Streptococcus*

*g__TM7-3*

*g__Veillonella*

0.000  0.0000

1.998  1.7400

4.142  1.3320

0.000  0.0000

0.314  0.5450

1.271  0.3220

0.656  0.5700

0.171  0.2960

0.000  0.0000

0.085  0.1480

0.342  0.5920

0.256  0.4440

0.513  0.8880

0.000  0.0000

0.342  0.5920

0.000  0.0000

0.171  0.2960

0.171  0.2960

14.375  7.1420

0.844  0.7980

1.469  1.4140

1.671  0.1890

1.929  2.5060

0.171  0.2960

0.000  0.0000

0.000  0.0000

0.085  0.1480

1.015  0.5410

11.907  4.9990

15.229  11.7190

1.282  2.2210

2.997  1.9700

0.342  0.5920

1.756  0.1530

0.000  0.0000

8.894  1.2120

0.000  0.0000

5.040  0.5210

0.000  0.0000

0.607  0.6880

0.693  0.7660

0.000  0.0000

0.000  0.0000

0.291  0.3380

0.191  0.2500

0.183  0.3110

0.043  0.1060

0.007  0.0180

0.043  0.0720

0.164  0.2270

0.535  0.9510

0.111  0.2440

0.134  0.1780

0.212  0.3470

0.191  0.2110

8.400  20.0280

41.508  25.4290

0.000  0.0000

0.071  0.1140

0.171  0.2650

0.331  0.4720

0.000  0.0000

0.057  0.1390

0.000  0.0000

0.000  0.0000

0.219  0.2770

3.542  3.9860

8.066  9.7670

0.051  0.1240

4.470  6.0350

0.704  1.0000

18.230  14.5060

0.125  0.3070

2.172  2.4660

0.000  0.0000

1.224  1.6700

0.000  0.0000

2.486  3.0010

1.562  0.6670

0.000  0.0000

0.133  0.1880

3.472  4.9100

0.924  0.7920

0.643  0.1190

0.000  0.0000

0.000  0.0000

0.000  0.0000

0.283  0.1150

0.009  0.0130

0.000  0.0000

0.206  0.2910

0.238  0.3370

0.814  0.6370

0.476  0.6740

16.014  19.0070

0.000  0.0000

0.394  0.5570

1.208  1.1940

1.361  0.3820

0.064  0.0910

0.435  0.6150

0.000  0.0000

0.000  0.0000

0.147  0.2070

15.383  19.1840

13.718  14.5410

0.000  0.0000

6.589  6.6240

2.161  2.5410

5.444  6.7010

0.005  0.0060

5.952  5.8460

0.000  0.0000

5.216  5.3200

Data are the mean percentage  standard deviation of the mean; IPF, idiopathic pulmonary fibrosis;

Other, includes patients with collagen vascular disease-associated interstitial lung disease; BALF, bronchoalveolar lavage fluid.
